# Supplementary material for: The dual role of borohydride salts in enhancing perovskite solar cell performance and stability
Source: Royal Society of Chemistry journal article supplement (doi:10.1039/d5se01476j), 2026-01-01
Supplement: d5se01476j1.pdf [file d5se01476j1.pdf]

## Supporting Information

### The dual role of borohydride salts in enhancing perovskite solar cell performance and stability

*Teresa Diaz Perez<sup>a,d</sup>, Carina Pareja-Rivera<sup>a</sup>, Jorge Pascual<sup>c</sup>, Héctor Juárez Santiesteban<sup>d</sup>,  
Sofía Masi<sup>a\*</sup>, Eva M Barea<sup>a\*</sup>, Silver-Hamill Turren-Cruz<sup>b\*</sup> and Iván Mora-Seró<sup>a\*</sup>.*

<sup>a</sup> *Institute of Advanced Materials (INAM), University Jaume I, Av. Vicent Sos Baynat, s/n, 12071, Castellón de la Plana, Spain.*

<sup>b</sup> *Instituto de Ciencia de los Materiales (ICMUV), Universitat de Valencia, 46980 Paterna, Spain*

<sup>c</sup> *Polymat, University of the Basque Country UPV/EHU, 20018 Donostia-San Sebastian, Spain.*

<sup>d</sup> *Centro de Investigación en Dispositivos Semiconductores, Benemérita Universidad Autónoma de Puebla, 14 Sur and Av. San Claudio, San Manuel 72000, Puebla, México*

\*Corresponding authors: S.M., E.M.B.B., S.H.T.C and I.M.S.

## Materials

Formamidinium iodide (FAI, 99.99%) and methylammonium chloride (MACl, 98%) were purchased from GreatCell Solar. Lead iodide ( $\text{PbI}_2$ , >98%) from TCI. Cesium iodide (CsI, 99.99%), potassium borohydride ( $\text{KBH}_4$ , 99.9%), sodium borohydride ( $\text{NaBH}_4$ , 99%), dimethyl-sulfoxide (DMSO, anhydrous, >99.9%) and N,N-dimethylformamide (DMF, anhydrous, 99.9%) and chlorobenzene (CB, anhydrous, 99.8%) were purchased from Sigma-Aldrich.

Acetonitrile (ACN, Anhydrous, 99.8%), 4-tert-butylpyridine (tBP, 96%), Lithium bis(trifluoromethylsulfonyl)imide (Li-TFSI, 99.95%), and cobalt from Sigma Aldrich. 2,20,7,70-tetrakis[N,N-di(4-methoxyphenyl)amino]-9,90-spirobifluorene (Spiro-MeOTAD, 99%) from Feiming Chemical Limited. Tin oxide ( $\text{SnO}_2$ , 15% in  $\text{H}_2\text{O}$  colloidal dispersion liquid) was supplied by Alfa Aesar.

Indium tin oxide (ITO) coated glass substrates (25 x 25 mm, Pilkington TEC-15,  $\sim 15 \Omega/\text{sq}$ ). For substrate cleaning, we used cleaner 2-propanol (IPA), ethanol and acetone were obtained from VWR International Ltd.

## Device fabrication

### *Substrate cleaning*

ITO-coated glass substrates were cleaned sequentially using soap, deionized water, acetone, and isopropanol under ultrasonication for 15 minutes each. The substrates were then dried using nitrogen ( $\text{N}_2$ ) gas and further treated with ultraviolet ozone (UVO) for 15 minutes to remove organic impurities from their surface.

### *Electron transport layer (ETL) deposition*

Before perovskite deposition, the  $\text{SnO}_2$  was deposited by spin-coating a colloidal  $\text{SnO}_2$  solution (1:1 M in deionized water) at 4000 rpm for 40 seconds. Subsequently, the substrates were annealed at  $150^\circ\text{C}$  for 30 minutes.

### *Perovskite Precursor Solution*

#### CsFAPbI<sub>3</sub>:

The Cs<sub>0.1</sub>FA<sub>0.9</sub>PbI<sub>3</sub> stock solution was prepared at a concentration of 1.5M in anhydrous DMF: DMSO (4:1 v/v). After ensuring complete dissolution, the solution was diluted to a final concentration of 1.4M. Additionally, 0.2 mmol of MACl was added and dissolved in the same solution.

#### Cs<sub>0.1</sub>FA<sub>0.9</sub>PbI<sub>3</sub> +KBH<sub>4</sub>:

A KBH<sub>4</sub> stock solution (0.05 mg/ml, 0.93 mM) was prepared in anhydrous DMF: DMSO (4:1 v/v) and subsequently incorporated into the perovskite precursor solution.

#### Cs<sub>0.1</sub>FA<sub>0.9</sub>PbI<sub>3</sub> +NaBH<sub>4</sub>:

Similarly, a NaBH<sub>4</sub> stock solution (0.05 mg/ml, 1.32 mM) was prepared in anhydrous DMF: DMSO (4:1 v/v) and incorporation into the perovskite precursor solution.

### *Perovskite Layer Deposition and Aging*

The perovskite solution was deposited using a two-step spin-coated program: 10 seconds at 1000 rpm (ramp rate: 200 rpm/s), followed by 22 seconds at 4000 rpm (ramp rate: 4000 rpm/s). During the second step, 250 µL of chlorobenzene was dropped onto the spinning substrate 11 seconds before the end of the program. The substrates were then annealed at 150°C for 10 minutes. Some films were not used for fresh film characterization of solar cell fabrication and were aged for 3 months stored under dark in a dry box at 20% RH and 21°C.

### *Hole Transport Layer (HTL) Deposition*

The Spiro-MeOTAD solutions were prepared by dissolving (0.150 gr, 69.9 mM ) in 1.75 mL chlorobenzene and followed by the addition of 4-tert-butylpyridine (t-BP, 59.17 µL, 228.3 mM), Lithium bis(trifluoromethylsulfonyl) imide (Li-TFSI; 0.458 gr,

1.8 M) Cobalto (Co; 0.147gr, 0.25 M). The Spiro-MeOTAD solution was deposited by spin coating at 4000 rpm for 35 s. Finally, thermal evaporation deposited an 80 nm gold electrode as a metal contact

## **Device characterization**

### *X-ray diffraction (XRD)*

The films' XRD patterns were obtained using a D8 Advance X-ray diffractometer (Bruker-AXS) in Bragg-Brentano geometry. Measurements were conducted using Cu K $\alpha$  radiation with range of 10–55° with a step size of 0.02° and a dwell time of 5 seconds per step. The films were deposited on glass substrates.

### *Scanning Electron Microscope (SEM)*

SEM characterization was performed using a field-emission gun scanning electron microscope (FEG-SEM) JEOL 3100F operated at 15 kV to obtain top-view images and analyze the morphology of the perovskite layers.

### *UV-Vis Spectra*

Absorbance measurements of the perovskite films deposited on glass substrates were conducted using a UV-Vis spectrophotometer (Varian Cary 300).

### *Photoluminescence Spectra (Visible and infrared)*

PL spectra (visible and infrared regions) were obtained to evaluate the photophysical properties of the perovskite films were conducted using Horiba Fluorolog exciting the samples at 532 nm. The PL were recorded from films deposited on top of the glass substrate.

### *Incident-photon-to current conversion efficiency (IPCE)*

IPCE measurements were performed using a QEPVSI-b Oriel system in DC mode.

### *Electrochemical Impedance Spectroscopy (EIS)*

EIS was carried out using a Potentiostat Autolab PGSTAT-30. Light intensity varied up to 1 sun using filters, and measurements were conducted with a 20 mV AC voltage perturbation over a frequency range of 1 Hz to 100 kHz. Measurements were recorded under different applied potentials (0 to 1.2 V) and 1 sun illumination. Data acquisition was performed using Nova software, and spectra fitting was conducted with Z-View software using an equivalent circuit model previously reported.

### *Solar Cell Characterization*

Solar Cell Characterization was carried out using a Keithley 2612 source meter under AM 1.5 G ( $1000 \text{ W/m}^2$ ) provided by an Abet Solar Simulator equipped with a 150-watt Xenon short-arc lamp (Ushio). Measurements were performed in ambient air at  $\sim 25^\circ\text{C}$  and without encapsulation.

J–V (current density–voltage) curve measurements were performed using a voltage sweep starting from 1.2 V to a final potential of -0.05 V for reverse scan and vice versa for forward scan. The scan rate was maintained at 10 mV/s. The active area of solar cell was  $0.086 \text{ cm}^2$ .

## Supplementary Figures Section

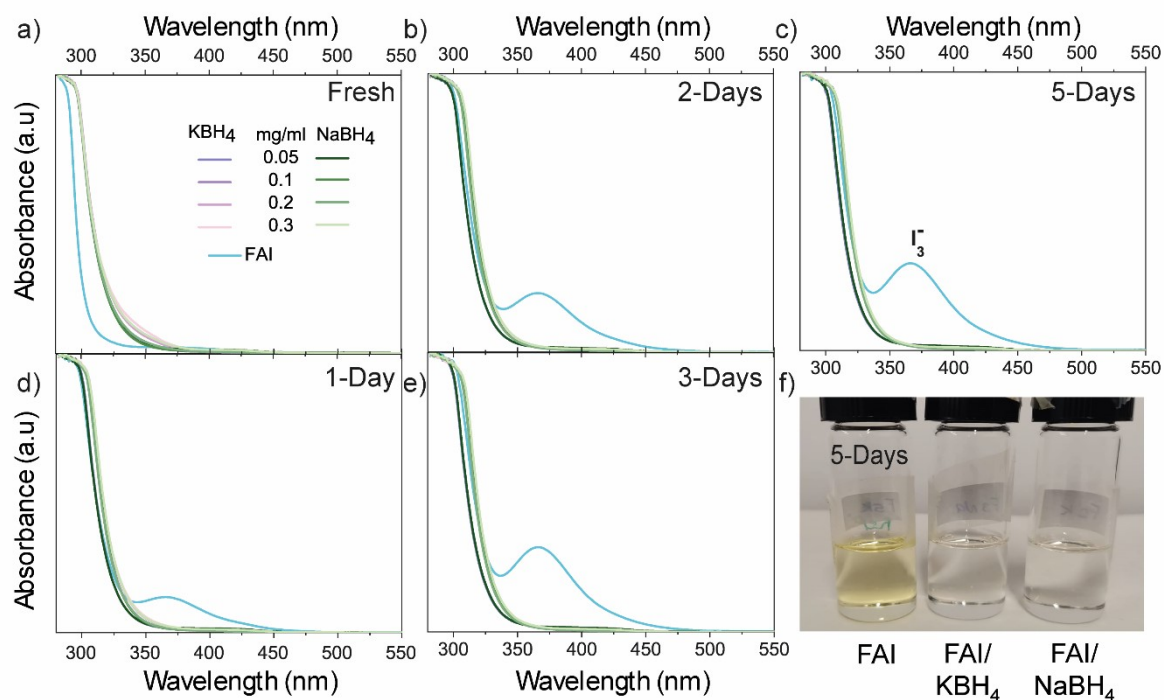

**Figure S1** UV-Vis absorption spectra of FAI, FAI +KBH<sub>4</sub> and FAI +NaBH<sub>4</sub> at different concentrations of 0.05, 0.1, 0.2, and 0.3 mg/mL, in DMF: DMSO (4:1 v/v) (a-e) and the f) FAI solutions from freshly prepared to five days of aging in air from fresh to 5 days.

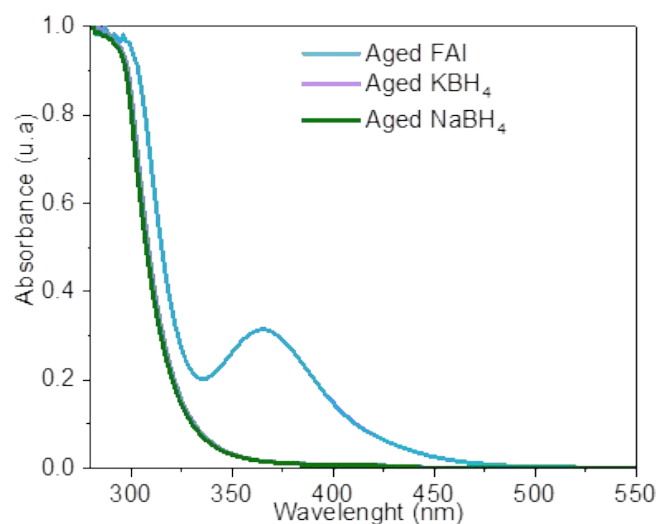

**Figure S2** UV-Vis absorption spectra of aged FAI, aged KBH<sub>4</sub> and aged NaBH<sub>4</sub> were prepared to five days of aging in air. FAI solution in DMF was exposed in air and clearly exhibited the formation of I<sub>2</sub>. As evidenced by the appearance of a yellowish color and showing a characteristic absorption peak at 365 nm corresponding to the I<sub>3</sub><sup>-</sup> species. When the borohydride additive was added to aged FAI solution, the yellow color disappeared immediately and the solution regained its transparent appearance confirming that I<sub>2</sub> was reduced to I<sup>-</sup>.



**Table S1** Statistical parameters of the domain size distribution to fresh and 3-months aged perovskite films sample with/without +KBH<sub>4</sub> and +NaBH<sub>4</sub>.

| <b>Sample</b>                  | <b>Mean size (nm)</b> | <b>Standard deviation (nm)</b> | <b>Minimum size (nm)</b> | <b>Maximum size (nm)</b> |
|--------------------------------|-----------------------|--------------------------------|--------------------------|--------------------------|
| <b>Fresh Reference</b>         | 630                   | 110                            | 363                      | 945                      |
| <b>3-months</b>                | 730                   | 120                            | 512                      | 983                      |
| <b>Fresh +KBH<sub>4</sub></b>  | 720                   | 130                            | 506                      | 1138                     |
| <b>3-months</b>                | 780                   | 90                             | 596                      | 1020                     |
| <b>Fresh +NaBH<sub>4</sub></b> | 960                   | 170                            | 742                      | 1467                     |
| <b>3-months</b>                | 960                   | 130                            | 718                      | 1229                     |

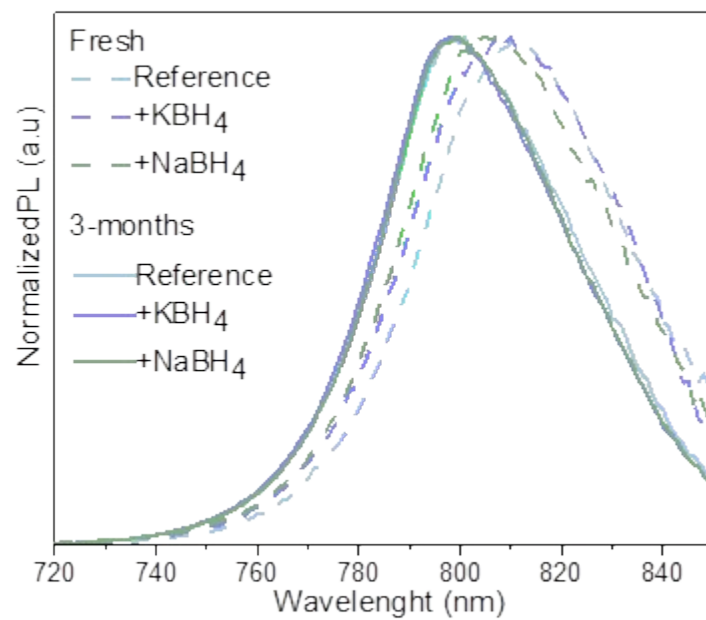

**Figure S3.** Steady-state PL spectra of fresh and 3-months aged “reference”, “reference +KBH<sub>4</sub>”, and “reference +NaBH<sub>4</sub>” perovskite films. After that, show a blueshift of peak wavelength of 810 to 798nm.

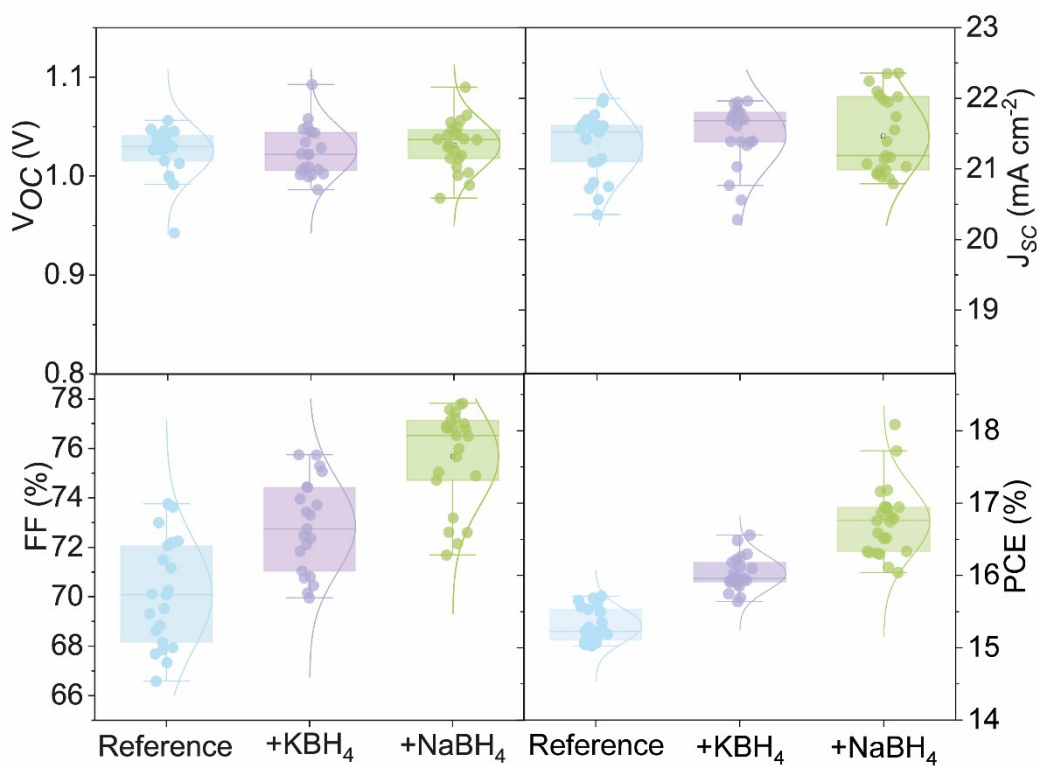

**Figure S4.** Photovoltaic performance showing  $J_{sc}$ ,  $V_{oc}$ ,  $FF$  and PCE of fresh perovskite solar cells with the statistical analysis. The statistical photovoltaic parameters of perovskite type Cs<sub>0.1</sub>FA<sub>0.9</sub>PbI<sub>3</sub> were three types of reference devices, KBH<sub>4</sub> and NaBH<sub>4</sub> were collected from ~20 devices.

**Table S2.** The photovoltaic parameters of perovskite solar cells based three types of devices fresh and 3-months aged of reference, +KBH<sub>4</sub>, and +NaBH<sub>4</sub>. The average photovoltaic characteristics of solar cells include the standard deviations of the  $J_{sc}$ ,  $V_{oc}$ ,  $FF$  and PCE. The champion cell efficiency is marked in black. The statistical distribution is based on ~20 devices.

| Sample                         | $V_{oc}$ (V) | $J_{sc}$ (mA cm <sup>-2</sup> ) | FF (%)   | PCE (%)    |
|--------------------------------|--------------|---------------------------------|----------|------------|
| <b>Fresh Reference</b>         | 1.02 ± 0.02  | 21.3 ± 0.5                      | 70 ± 2   | 15.3 ± 0.2 |
| <b>Champion</b>                | 1.0          | 22                              | 74       | 15.7       |
| <b>3-months</b>                | 0.99 ± 0.01  | 20.7 ± 0.8                      | 69.3 ± 3 | 14.3 ± 0.9 |
| <b>Champion</b>                | 1.0          | 21.5                            | 71       | 15.5       |
| <b>Fresh +KBH<sub>4</sub></b>  | 1.02 ± 0.02  | 21.4 ± 0.5                      | 73 ± 2   | 16 ± 0.2   |
| <b>Champion</b>                | 1.0          | 22                              | 76       | 16.5       |
| <b>3-months</b>                | 1.05 ± 0.02  | 21.2 ± 0.4                      | 73.7 ± 2 | 16.4 ± 0.4 |
| <b>Champion</b>                | 1.1          | 21.8                            | 75       | 17.7       |
| <b>Fresh +NaBH<sub>4</sub></b> | 1.03 ± 0.02  | 21.4 ± 0.5                      | 75 ± 2   | 16.7 ± 0.4 |
| <b>Champion</b>                | 1.1          | 22.3                            | 78       | 17.7       |
| <b>3-months</b>                | 1.07 ± 0.02  | 21.8 ± 0.4                      | 75.9 ± 2 | 17.8 ± 0.5 |
| <b>Champion</b>                | 1.1          | 21.7                            | 80       | 18.9       |

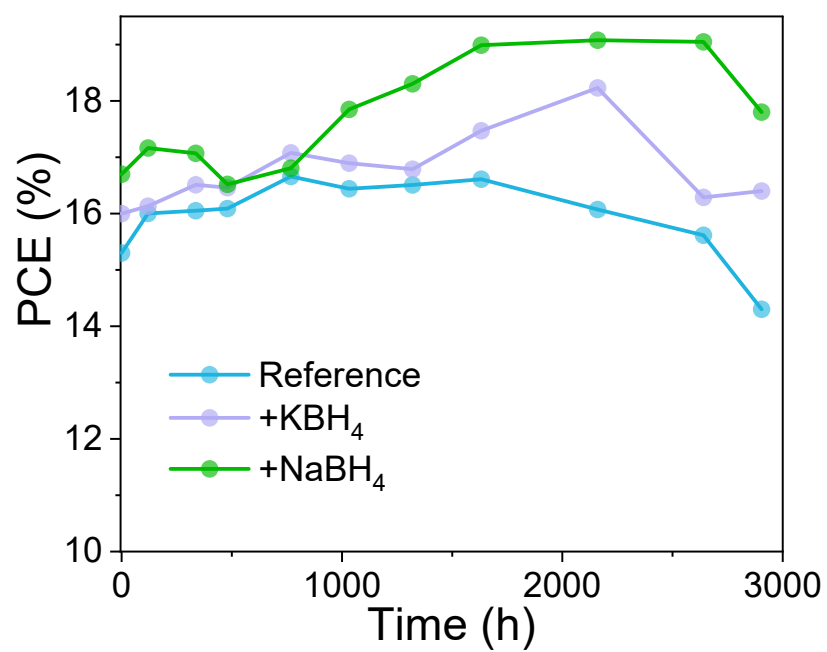

**Figure S5.** The long-term stability comparison of the unencapsulated with/without KBH<sub>4</sub> and NaBH<sub>4</sub> (0.05 mg/mL) shows the normalized power conversion efficiency (PCE). The devices were stored in ambient air (25 °C, RH 20% in dark conditions).

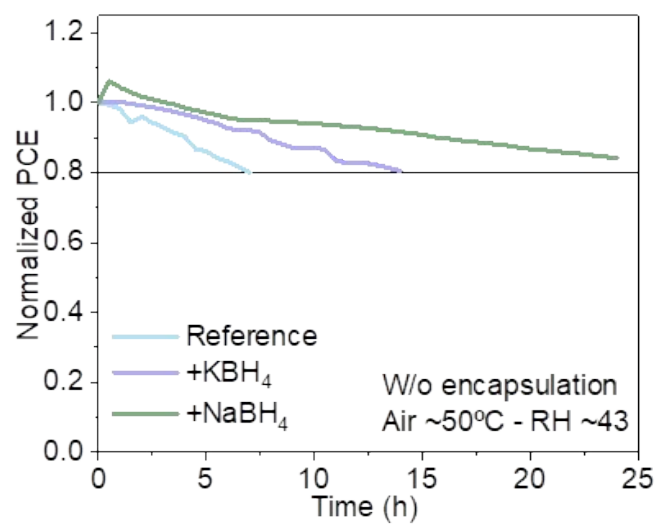

**Figure S6.** MPP measurements for the control, KBH<sub>4</sub> and NaBH<sub>4</sub> devices without any encapsulation.

**Table S3.** Photovoltaic parameters of the perovskite cells were exposed to high relative humidity (RH~60 ± 10%) and measured every week for a period of 5-weeks under illumination 1 sun in air.

| Sample                         | $J_{sc}$ (mA cm <sup>-2</sup> ) | $V_{oc}$ (V) | FF (%) | PCE (%) |
|--------------------------------|---------------------------------|--------------|--------|---------|
| <b>Fresh Reference</b>         |                                 |              |        |         |
| <b>Fresh</b>                   | 23.2                            | 1.0          | 68     | 16.1    |
| <b>1-week</b>                  | 19.9                            | 1.0          | 62     | 12.7    |
| <b>2-weeks</b>                 | 21.5                            | 1.1          | 45     | 10.7    |
| <b>5-weeks</b>                 | 17.8                            | 0.9          | 25     | 4.0     |
| <b>Fresh +KBH<sub>4</sub></b>  |                                 |              |        |         |
| <b>Fresh</b>                   | 21.2                            | 1.1          | 68     | 15.3    |
| <b>1-week</b>                  | 22.7                            | 1.0          | 79     | 18.5    |
| <b>2-weeks</b>                 | 23.4                            | 1.0          | 77     | 18.7    |
| <b>3-weeks</b>                 | 24.9                            | 1.0          | 63     | 16.5    |
| <b>4-weeks</b>                 | 24.5                            | 1.0          | 70     | 17.8    |
| <b>5-weeks</b>                 | 18.3                            | 1.0          | 52     | 9.5     |
| <b>Fresh +NaBH<sub>4</sub></b> |                                 |              |        |         |
| <b>Fresh</b>                   | 21.8                            | 1.1          | 70     | 16.2    |
| <b>1-week</b>                  | 24.8                            | 1.0          | 78     | 20.1    |
| <b>2-weeks</b>                 | 23.5                            | 1.1          | 76     | 18.9    |
| <b>3-weeks</b>                 | 23.5                            | 1.0          | 74     | 17.9    |
| <b>4-weeks</b>                 | 26.5                            | 1.0          | 72     | 20.1    |
| <b>5-weeks</b>                 | 20.8                            | 1.0          | 70     | 15.1    |

**Table S4.** The ideality factor ( $n$ ) of the cells obtained by linear adjustment of **Figure 7**.

| Weeks aged     | Reference | +KBH <sub>4</sub> | +NaBH <sub>4</sub> |
|----------------|-----------|-------------------|--------------------|
| <b>Fresh</b>   | 1.85      | 1.76              | 2.26               |
| <b>1-week</b>  | 5.0       | 1.8               | 1.6                |
| <b>2-weeks</b> | 4.78      | 1.56              | 1.78               |
| <b>3-weeks</b> |           | 2.2               | 1.6                |
| <b>4-weeks</b> |           | 2.3               | 1.8                |
| <b>5-weeks</b> |           | 4.23              | 1.82               |

**Table S5.** Parameters between the open-circuit voltage and the illumination level. These data indicate that  $n_{id} = 1.85$  for the fresh device, 1.76 and 2.26 for the KBH<sub>4</sub> and NaBH<sub>4</sub> device. The measurements were carried out at room temperature (25 °C, RH~60 ± 10%).

| Filters | Illumination<br>(W m <sup>-2</sup> ) | Reference<br>$V_{oc}$ (V) | KBH <sub>4</sub><br>$V_{oc}$ (V) | NaBH <sub>4</sub><br>$V_{oc}$ (V) |
|---------|--------------------------------------|---------------------------|----------------------------------|-----------------------------------|
| 0       | 1000                                 | 1.05                      | 0.99                             | 1.04                              |
| 0.3     | 501                                  | 0.90                      | 0.92                             | 0.91                              |
| 0.5     | 310                                  | 0.93                      | 0.93                             | 0.92                              |
| 1       | 100                                  | 0.23                      | 0.92                             | 0.88                              |
| 2       | 10                                   | 0.83                      | 0.84                             | 0.81                              |
| 3       | 1                                    | 0.66                      | 0.65                             | 0.58                              |



**Table S6.** Parameters between the open-circuit voltage and the illumination level. These data indicate that  $n_{id} = 4.78$  for the reference, 1.56 and 1.78 for the  $\text{KBH}_4$  and  $\text{NaBH}_4$  device after 2-weeks of aging. The measurements were carried out at room temperature ( $25\text{ }^\circ\text{C}$ ,  $\text{RH}\sim 60 \pm 10\%$ ).

| Filters | Illumination<br>( $\text{W m}^{-2}$ ) | Reference<br>$V_{oc}$ (V) | $\text{KBH}_4$<br>$V_{oc}$ (V) | $\text{NaBH}_4$<br>$V_{oc}$ (V) |
|---------|---------------------------------------|---------------------------|--------------------------------|---------------------------------|
| 0       | 1000                                  | 1.03                      | 1.08                           | 1.05                            |
| 0.3     | 501                                   | 0.89                      | 0.84                           | 0.90                            |
| 0.5     | 310                                   | 0.90                      | 0.89                           | 0.91                            |
| 1       | 100                                   | 0.89                      | 0.85                           | 0.90                            |
| 2       | 10                                    | 0.83                      | 0.50                           | 0.84                            |
| 3       | 1                                     | 0.69                      | 0.19                           | 0.66                            |

**Table S7.** Parameters between the open-circuit voltage and the illumination level. These data indicate that  $n_{id} = 4.23$  and 1.86 for the  $\text{KBH}_4$  and  $\text{NaBH}_4$  device after 5-weeks of aging. The measurements were carried out at room temperature ( $25\text{ }^\circ\text{C}$ ,  $\text{RH}\sim 60 \pm 10\%$ ).

| Filters | Illumination<br>( $\text{W m}^{-2}$ ) | $\text{KBH}_4$<br>$V_{oc}$ (V) | $\text{NaBH}_4$<br>$V_{oc}$ (V) |
|---------|---------------------------------------|--------------------------------|---------------------------------|
| 0       | 1000                                  | 0.94                           | 1.04                            |
| 0.3     | 501                                   | 0.47                           | 0.87                            |
| 0.5     | 310                                   | 0.47                           | 0.89                            |
| 1       | 100                                   | 0.19                           | 0.87                            |
| 2       | 10                                    | 0.19                           | 0.80                            |
| 3       | 1                                     | 0.00                           | 0.64                            |
